# Supplementary material for: Residue of Chlormequat and Regulatory Effects on the Specialized Metabolites of Astragali Radix
Source: MDPI journal article supplement (doi:10.3390/molecules28196754), 2023-09-22
Supplement: s1 [file s1]

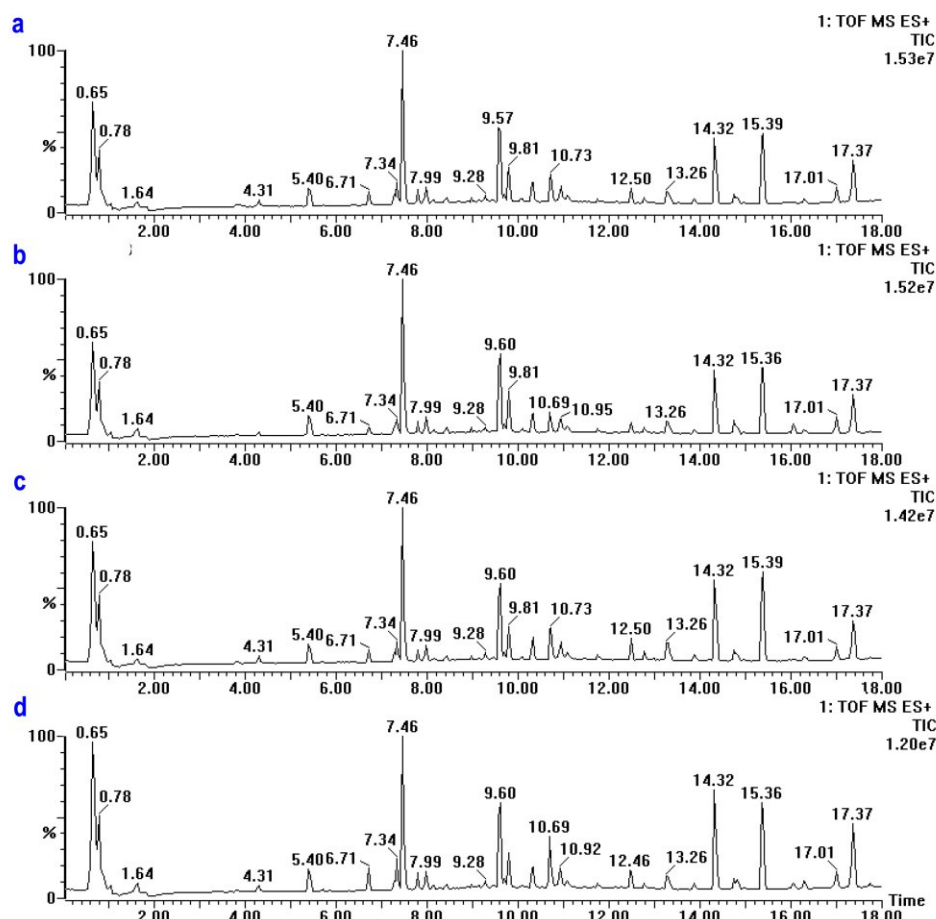

**Supplementary Figure S1.** The TIC chromatography of different treatment groups of *Astragali Radix*. a, represents the control group; b, the chlormequat concentration was 0.1 g/L; c, the chlormequat concentration was 1.0 g/L, and d indicated the chlormequat concentration was 10.0 g/L.

**Supplementary Table S1.** Chlormequat residue levels in different treatment groups of *Astragali Radix*.

| Concentrations of chlormequat | Samples | Residue Level ( $\mu\text{g/kg}$ ) |
|-------------------------------|---------|------------------------------------|
| —                             | CK-1    | 25.02                              |
|                               | CK-2    | 24.25                              |
|                               | CK-3    | 19.18                              |
| 0.1 g/L                       | T1-1    | 163.80                             |
|                               | T1-2    | 179.40                             |
|                               | T1-3    | 218.95                             |
| 1.0 g/L                       | T2-1    | 690.56                             |
|                               | T2-2    | 458.81                             |
|                               | T2-3    | 553.22                             |
| 10.0 g/L                      | T3-1    | 5608.68                            |
|                               | T3-2    | 5099.12                            |
|                               | T3-3    | 5501.23                            |

**Supplementary Table S2.** The identified metabolites and their response intensities in different treatment samples.

| Compound       | CK1    | CK2    | CK3   | T1-1   | T1-2  | T1-3  | T2-1  | T2-2  | T2-3  | T3-1  | T3-2  | T3-3  |
|----------------|--------|--------|-------|--------|-------|-------|-------|-------|-------|-------|-------|-------|
|                | CK     | CK     | CK    | T1     | T1    | T1    | T2    | T2    | T2    | T3    | T3    | T3    |
| 6.71_679.5082  | 2314   | 3177   | 4071  | 3884   | 6118  | 5591  | 11276 | 5555  | 7655  | 1869  | 3431  | 8215  |
| 10.37_785.4671 | 2      | 1      | 2     | 2      | 2     | 2     | 4     | 2     | 2     | 2     | 1     | 1     |
| 10.95_954.1771 | 1430   | 1495   | 1414  | 1811   | 1411  | 1630  | 1854  | 1909  | 1646  | 2016  | 2023  | 1930  |
| 11.44_785.4645 | 14     | 16     | 13    | 15     | 19    | 18    | 18    | 17    | 18    | 18    | 19    | 16    |
| 11.75_785.4688 | 365    | 452    | 441   | 656    | 694   | 446   | 632   | 752   | 826   | 894   | 491   | 618   |
| 12.50_826.4710 | 3487   | 4042   | 3830  | 3596   | 4079  | 3957  | 6063  | 5668  | 5717  | 5851  | 5799  | 6000  |
| 12.99_827.4793 | 60     | 65     | 85    | 59     | 68    | 69    | 82    | 111   | 105   | 101   | 100   | 111   |
| 13.38_827.478  | 49     | 16     | 35    | 16     | 14    | 21    | 13    | 16    | 15    | 19    | 11    | 17    |
| 13.88_751.4265 | 145    | 125    | 121   | 206    | 162   | 207   | 213   | 303   | 162   | 282   | 223   | 282   |
| 14.32_868.4819 | 15151  | 19426  | 16646 | 19133  | 17569 | 17483 | 24375 | 23005 | 23761 | 24112 | 23777 | 23381 |
| 14.71_869.4907 | 30     | 41     | 44    | 47     | 40    | 29    | 48    | 58    | 31    | 54    | 29    | 64    |
| 14.74_943.5263 | 14085  | 16321  | 13826 | 17635  | 13737 | 12513 | 13346 | 14343 | 16390 | 15701 | 15228 | 14605 |
| 14.97_491.374  | 607    | 420    | 394   | 652    | 492   | 582   | 744   | 557   | 477   | 457   | 443   | 406   |
| 15.39_955.9906 | 6186   | 6565   | 6790  | 10589  | 8233  | 9647  | 10472 | 13245 | 9389  | 10668 | 10261 | 10774 |
| 5.40_447.1276  | 13680  | 16347  | 11113 | 11978  | 10544 | 9949  | 10526 | 9788  | 12775 | 9067  | 9280  | 10030 |
| 7.46_532.1206  | 111329 | 117449 | 92992 | 103915 | 99254 | 86564 | 86811 | 85279 | 94558 | 74057 | 75395 | 78052 |
| 7.99_431.1326  | 9205   | 11171  | 6979  | 7697   | 7936  | 6650  | 7348  | 6299  | 7642  | 5952  | 6126  | 6876  |
| 8.45_463.1571  | 2971   | 3137   | 2192  | 2023   | 1830  | 1641  | 1252  | 1476  | 2027  | 807   | 987   | 1405  |
| 8.97_549.1232  | 3680   | 3576   | 2934  | 2781   | 2727  | 2369  | 2167  | 2178  | 2710  | 1795  | 2069  | 1818  |
| 9.04_464.1681  | 15     | 18     | 36    | 5      | 7     | 8     | 10    | 5     | 11    | 9     | 4     | 10    |
| 9.60_516.1258  | 79803  | 86787  | 63041 | 66944  | 72707 | 59061 | 63614 | 57944 | 63573 | 52313 | 54779 | 58488 |
| 9.81_548.1522  | 24265  | 24940  | 19661 | 18309  | 16030 | 14104 | 10055 | 12586 | 15721 | 8203  | 9598  | 12900 |

|                |       |       |      |      |       |      |       |       |       |       |      |      |
|----------------|-------|-------|------|------|-------|------|-------|-------|-------|-------|------|------|
| 10.10_301.1059 | 154   | 159   | 138  | 99   | 87    | 68   | 31    | 48    | 74    | 22    | 26   | 52   |
| 10.33_285.0752 | 10242 | 12275 | 8095 | 9211 | 8755  | 8806 | 12528 | 11023 | 13030 | 11573 | 9460 | 8046 |
| 12.77_301.1059 | 3692  | 3958  | 2457 | 2814 | 2716  | 2551 | 3335  | 4119  | 4558  | 2764  | 2338 | 2409 |
| 13.30_269.0801 | 9087  | 12224 | 7083 | 8557 | 10613 | 7485 | 12881 | 12083 | 13172 | 21282 | 9632 | 7753 |

---

**Supplementary Table S3.** The optimized MS parameters for the targeted analytes.

| No. | Compound                                 | Q1    | Precursor Ion (m/z) | Product Ions (m/z) | CE (V) | Ionization Mode | Rt (min) |
|-----|------------------------------------------|-------|---------------------|--------------------|--------|-----------------|----------|
| 1   | Astragaloside IV                         | 785.6 | 120                 | 143.1*/437.3.0     | 30/20  | ESI+            | 6.69     |
| 2   | Astragaloside I                          | 869.5 | 120                 | 143.2*/437.3       | 30/20  | ESI+            | 8.8      |
| 3   | Astragaloside II                         | 827.5 | 120                 | 143.0*/437.5       | 30/20  | ESI+            | 7.44     |
| 4   | Astragaloside III                        | 785.6 | 120                 | 143.1*/437.3       | 30/20  | ESI+            | 5.87     |
| 5   | Cycloastragenol                          | 491.5 | 90                  | 143.0*/437         | 20/15  | ESI+            | 9.48     |
| 6   | Isoastragaloside II                      | 827.5 | 120                 | 143.0*/437.5       | 30/20  | ESI+            | 7.83     |
| 7   | Isoastragaloside IV                      | 785.6 | 120                 | 143.1*/437.3       | 30/20  | ESI+            | 6.91     |
| 8   | Methylnissolin 3-O-glucoside             | 463.4 | 90                  | 167.0*/301         | 35/15  | ESI+            | 5.1      |
| 9   | Astraisoflavan-7-O- $\beta$ -D-glucoside | 465.2 | 90                  | 123.0*/167.1       | 30/30  | ESI+            | 5.34     |
| 10  | Formononetin                             | 269.1 | 120                 | 253.1*/226.1       | 40/40  | ESI+            | 8.29     |
| 11  | Ononin                                   | 431.2 | 180                 | 269.1*/254         | 30/55  | ESI+            | 4.87     |
| 12  | Calycosin                                | 285.1 | 120                 | 270.1*/137.1       | 30/20  | ESI+            | 6.26     |
| 13  | Calycosin-7-glucoside                    | 447.4 | 180                 | 285.1*/270.1       | 30/55  | ESI+            | 3.96     |

Note: \* Product Ions used for quantification

**Supplementary Table S4.** Method validation results including the linearity, limit of detection (LOD) and limit of quantification (LOQ), precision (relative standard deviation, RSD, %), recovery (%), and stability (RSD, %).

| Analytes                                 | Linearity |               | LOD (ng/mL) | LOQ (ng/mL) | Precision (RSD, %) |           | Recovery% (RSD, %) |               |              | Stability (RSD, %) |
|------------------------------------------|-----------|---------------|-------------|-------------|--------------------|-----------|--------------------|---------------|--------------|--------------------|
|                                          | $r^2$     | Range (ng/mL) |             |             | Intra-Day          | Inter-Day | Low Level          | Medium Level  | High Level   |                    |
| Astragaloside IV                         | 0.9998    | 10-2500       | 10          | 30          | 2.02               | 2.67      | 95.28 (1.47)       | 93.45 (2.02)  | 97.34 (1.06) | 1.24               |
| Astragaloside I                          | 0.9935    | 100-2500      | 20          | 50          | 1.2                | 1.33      | 91.74 (0.47)       | 91.32(1.22)   | 87.59(3.71)  | 3.17               |
| Astragaloside II                         | 0.9939    | 10-2500       | 20          | 50          | 2.38               | 1.86      | 82.55 (2.12)       | 81.54(0.96)   | 101.82(1.89) | 1.98               |
| Astragaloside III                        | 0.9925    | 10-2500       | 5           | 10          | 1.82               | 2.17      | 102.90 (1.28)      | 103.29(0.96)  | 103.47(2.73) | 3.51               |
| Cycloastragenol                          | 0.9996    | 10-2500       | 5           | 10          | 1.97               | 3.81      | 110.49 (0.34)      | 97.03(1.40)   | 97.64(1.48)  | 1.23               |
| Isoastragaloside II                      | 0.9978    | 10-2500       | 20          | 50          | 2.65               | 2.13      | 101.37 (2.36)      | 94.59 (1.38)  | 88.00(3.38)  | 3.2                |
| Isoastragaloside IV                      | 0.9925    | 100-2500      | 10          | 30          | 1.73               | 2.05      | 92.40 (5.36)       | 91.40 (3.10)  | 96.15(2.34)  | 2.43               |
| Methylnissolin 3-O-glucoside             | 0.9983    | 10-1000       | 0.2         | 0.5         | 2.6                | 2.41      | 100.84 (3.01)      | 101.66 (1.55) | 101.58(1.55) | 4.21               |
| Astraisoflavan-7-O- $\beta$ -D-glucoside | 0.9991    | 10-2500       | 2           | 5           | 1.91               | 1.26      | 82.91 (1.16)       | 96.71 (0.67)  | 98.41(1.05)  | 1.71               |
| Formononetin                             | 0.9996    | 10-500        | 0.2         | 0.5         | 1.21               | 1.38      | 85.51(4.46)        | 101.71(1.31)  | 99.11(1.76)  | 2.75               |
| Ononin                                   | 0.9991    | 10-500        | 0.2         | 0.5         | 1.85               | 1.52      | 97.72(0.56)        | 90.40(5.22)   | 95.20 (1.64) | 3.87               |
| Calycosin                                | 0.9993    | 10-500        | 0.2         | 0.5         | 1.82               | 1.25      | 100.56 (5.19)      | 104.38 (1.50) | 96.76 (1.66) | 1.44               |
| Calycosin-7-glucoside                    | 0.9981    | 10-1000       | 0.2         | 0.5         | 1.01               | 0.97      | 90.38 (0.74)       | 92.13 (2.30)  | 98.93 (4.44) | 0.53               |
